# Supplementary material for: “To Be Microbiocidal and Not to Be Cytotoxic at the Same Time…”—Silver Nanoparticles and Their Main Role on the Surface of Titanium Alloy Implants
Source: MDPI journal article supplement (doi:10.3390/jcm8030334), 2019-03-10
Supplement: s1 [file s1]

**Table S1.** The results of the contact angle measurements, which were made three times using distilled water and diiodomethane and the results of the surface free energy (SFE) of biomaterials used in Owens-Wendt method.

| Biomaterial Sample    | Average Contact Angle [°] ± Standard Deviation |               | SFE [mJ/m <sup>2</sup> ] |
|-----------------------|------------------------------------------------|---------------|--------------------------|
|                       | Measuring Liquid                               |               |                          |
|                       | Water                                          | Diiodomethane |                          |
| Ti6Al4V               | 108.3 ± 0.09                                   | 37 ± 0.16     | 45.37 ± 0.05             |
| Ti6Al4V/0.9AgNPs      | 99.9 ± 0.44                                    | 59.0 ± 0.11   | 28.83 ± 0.04             |
| Ti6Al4V/1.1AgNPs      | 104.2 ± 0.32                                   | 65.0 ± 0.12   | 25.53 ± 0.03             |
| Ti6Al4V/1.3AgNPs      | 105.2 ± 0.13                                   | 71.0 ± 0.83   | 22.02 ± 0.17             |
| Ti6Al4V/2.3AgNPs      | 114.8 ± 0.06                                   | 60.3 ± 1.24   | 31.14 ± 0.30             |
| Ti6Al4V/TNT5          | 64.5 ± 0.8                                     | 48.5 ± 2.3    | 42.3 ± 2.04              |
| Ti6Al4V/TNT5/0.6AgNPs | 86.0 ± 0.34                                    | 67.1 ± 0.68   | 26.43 ± 0.17             |
| Ti6Al4V/TNT5/1.0AgNPs | 88.7 ± 0.54                                    | 45.5 ± 0.15   | 36.18 ± 0.06             |
| Ti6Al4V/TNT5/1.6AgNPs | 85.1 ± 0.93                                    | 31.9 ± 1.40   | 42.73 ± 0.43             |
| Ti6Al4V/TNT5/2.3AgNPs | 71.7 ± 1.69                                    | 39.0 ± 1.25   | 42.09 ± 0.46             |

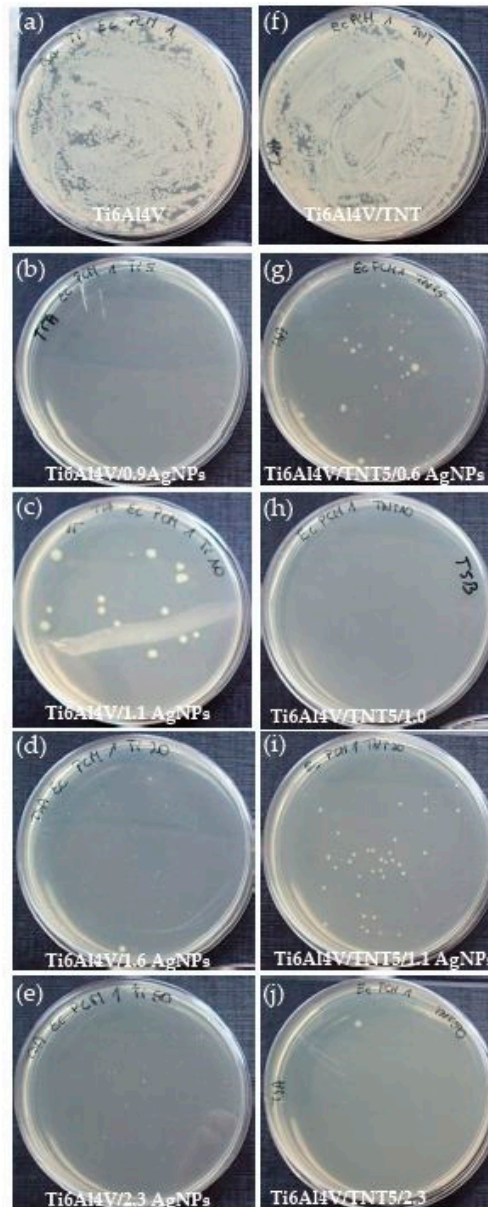

**Figure S1.** Reduction of colony number of *Escherichia coli* ATCC25922=PCM2057 after treatment with silver ions released from Ti6Al4V/AgNPs (b–e) and Ti6Al4V/TNT5/AgNPs (g–j) for 24 h. Number of bacterial colonies after treatment with Ti6Al4V/AgNPs and Ti6Al4V/TNT5/AgNPs was reduced at least 100 fold when compared to Ti6Al4V ( $7.0 \times 10^5$  c.f.u. ml<sup>-1</sup>) (a) and Ti6Al4V/TNT5 ( $3.8 \times 10^5$  c.f.u. ml<sup>-1</sup>) (b).
